# Supplementary material
Source: PubMed Central journal article supplement (PMC5588757)

Supp 1

**A** CD4 T cell activation

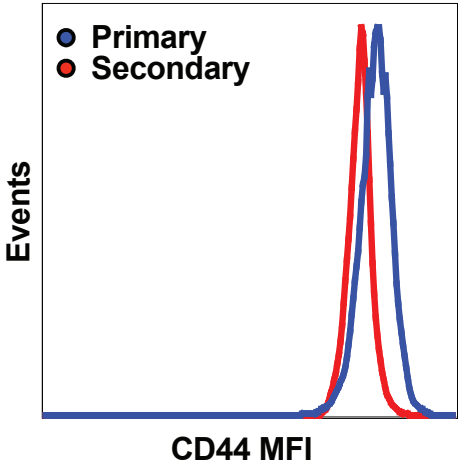

**B**  $p=0.01$

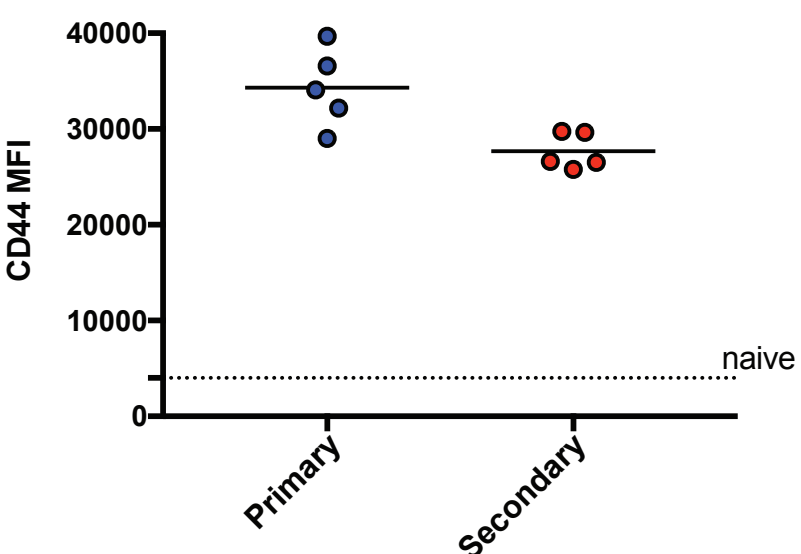

# Supp 2

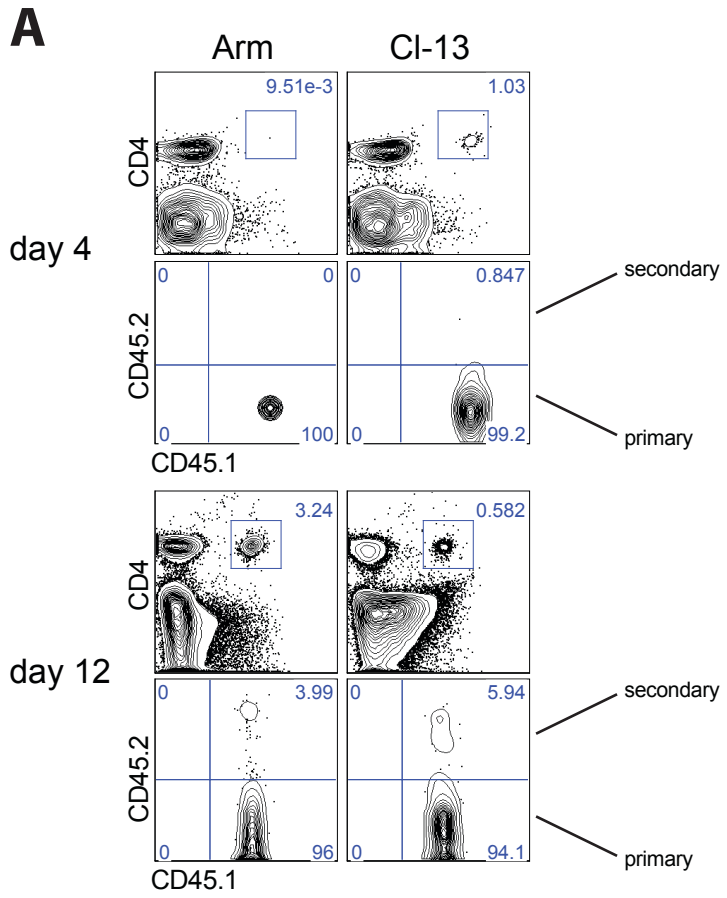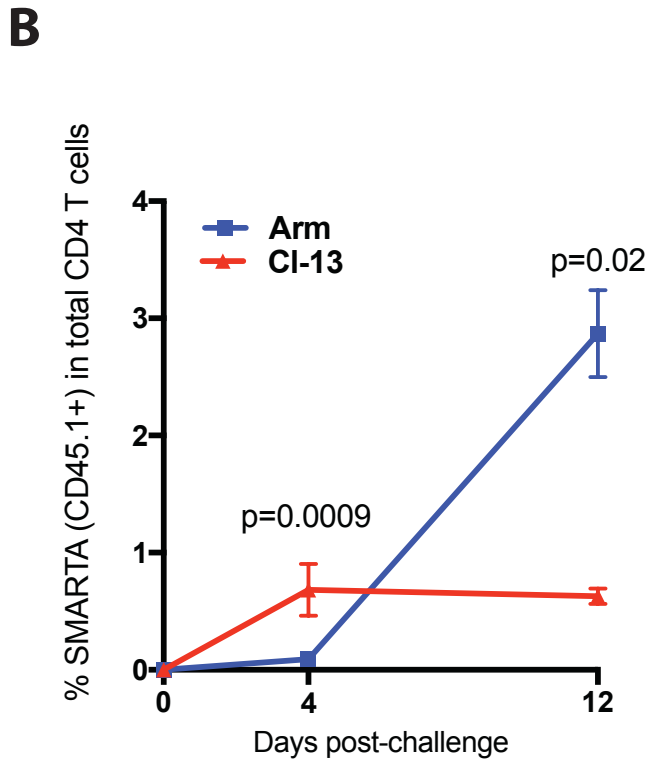

# Supp 3

**A** Gated from CD45.1+

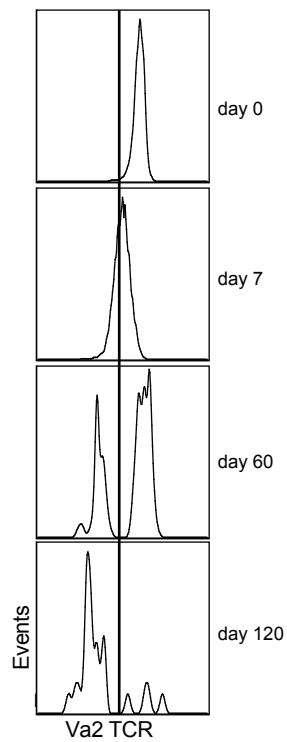

**B**

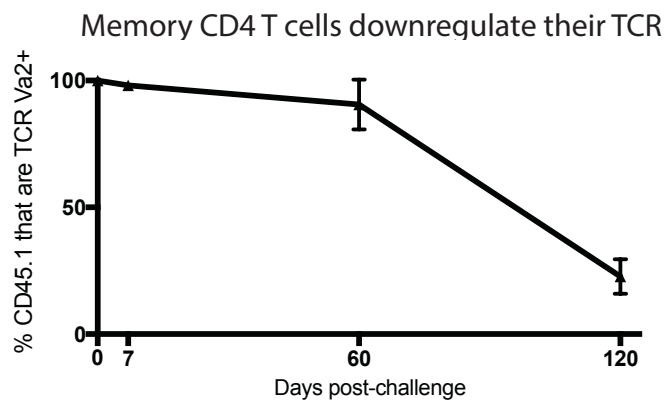

Supp 4

5x10<sup>6</sup> co-transferred SMARTAs

Tfh

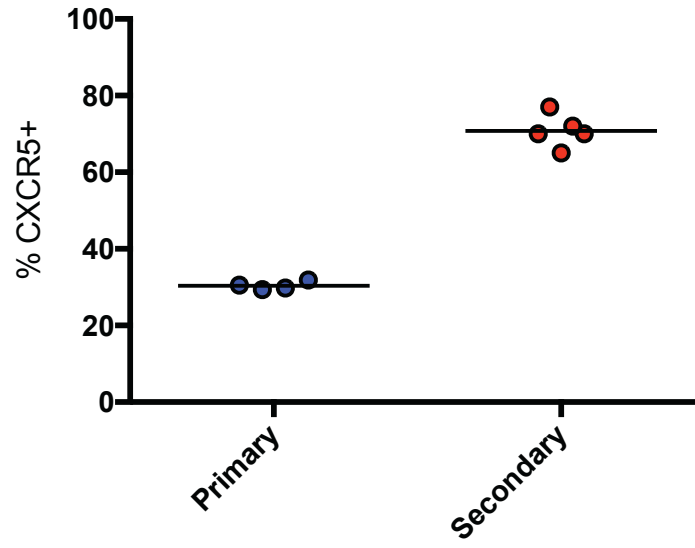

Supplement: IMM-152-328-s001.pdf [file IMM-152-328-s001.pdf]
